# Supplementary material for: Efficient synergism of concentric ring structures and carbon dots for enhanced methanol electro-oxidation
Source: Royal Society of Chemistry journal article supplement (doi:10.1039/d4ra04685d), 2024-01-01
Supplement: d4ra04685d1.pdf [file d4ra04685d1.pdf]

## Efficient synergism of concentric ring structure and carbon dots for enhanced methanol electrooxidation

Cong Xiang,<sup>‡a</sup> Yunyun Ling,<sup>‡a</sup> Zitong Zhou,<sup>a</sup> Xiaoyu Zhu,<sup>a</sup> Fan Xue,<sup>a</sup> Zhijun Feng,<sup>a</sup> Yiwei Wang,<sup>a</sup> Xinyi Cheng,<sup>a</sup> Meifang Wang,<sup>\*a</sup> and Xiaomei Cheng<sup>\*a, b</sup>

<sup>a</sup> Department of Pharmacy, Wannan Medical College, Wuhu 241002, China

<sup>b</sup> State Key Laboratory of Coordination Chemistry, Nanjing University, Nanjing 210023, China

\* Corresponding authors.

E-mail addresses: [zijingyuwint@163.com](mailto:zijingyuwint@163.com) (M. F. Wang), [chengxm@wnmc.edu.cn](mailto:chengxm@wnmc.edu.cn) (X. M. Cheng).

<sup>‡</sup> These authors contributed equally to this work.

### S1. Experimental section

Tauc's plot is drawn to get the optical bandgap ( $E_g$ ), for this, we use the following Tauc's relation [S1].

$$(\alpha h\nu)^{\frac{1}{n}} = A(h\nu - E_g) \quad (S1)$$

where  $h\nu$  is the energy of the photon  $\alpha$  is the absorption coefficient and  $E_g$  is the energy of the material and  $n$  is the index ( $n = \frac{1}{2}$  for a direct bandgap, and  $n = 2$  for an indirect band). The NiO/Ni-N-CDs0.05 have a direct optical band. The bandgap is obtained from the figure by fitting a plot between  $(\alpha h\nu)^2$  versus  $h\nu$ .

Electrochemically active surface areas (ECSA) were estimated from the electrochemical double-layer capacitance ( $C_{dl}$ ) based on CVs recorded at different scan rates in the non-faradaic potential range of 0.1-0.2 V vs. Ag/AgCl. Plotting the capacitive current ( $I_c$ ) vs. the scan rate ( $\nu$ ) yielded a straight line with a slope equal to  $C_{dl}$ . ECSA was calculated by dividing  $C_{dl}$  by the specific capacitance ( $C_s$ ) [S2]:

$$ECSA = C_{dl} / C_s \quad (S2)$$

where  $C_s$  is the reported value of  $0.06 \text{ mF/cm}^2$  based on the double layer capacitance of an ideal smooth oxide surface.

## S2. Figures

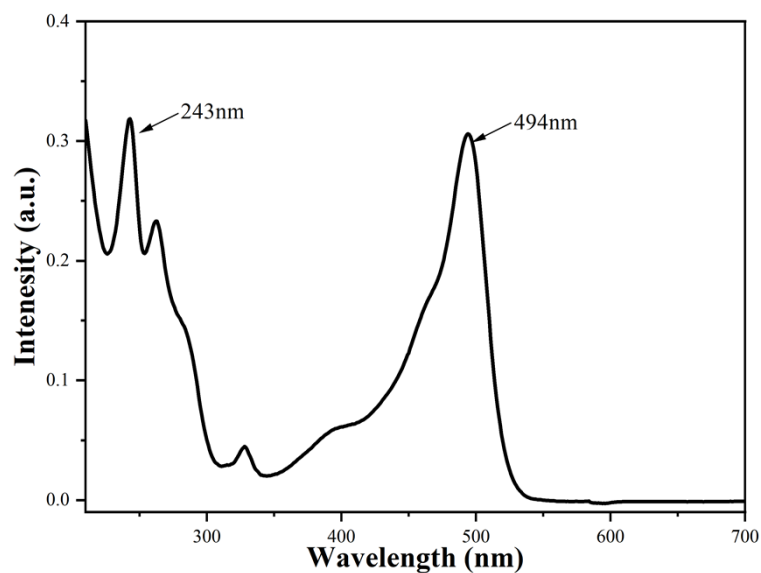

Figure S1. Absorption spectra of N-CDs.

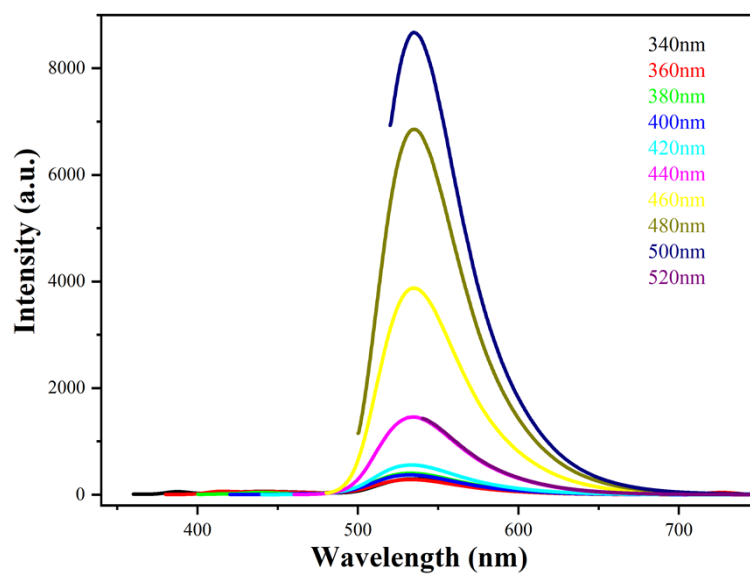

Figure S2. Emission spectra of N-CDs.

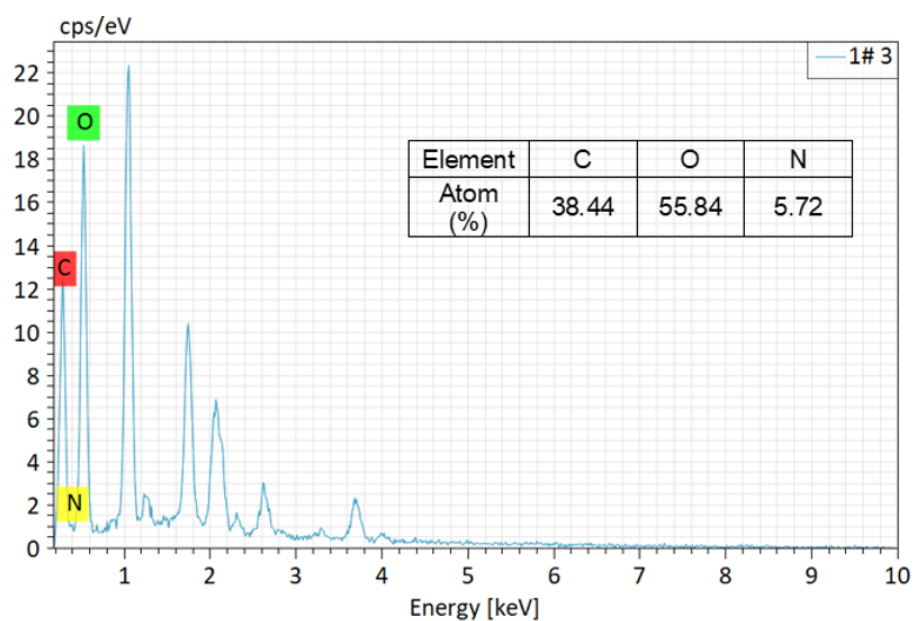

Figure S3. EDS of N-CDs.

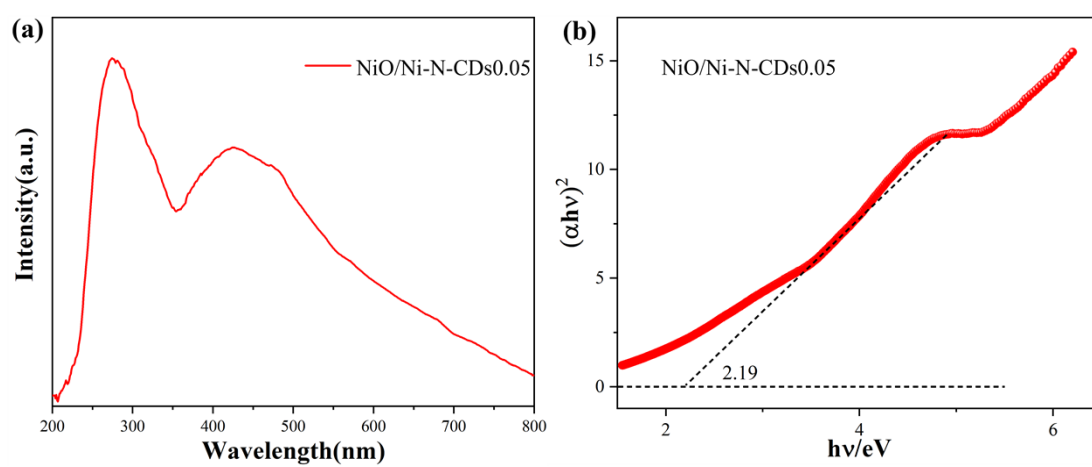

Figure S4. DR-UV-vis absorption spectra of NiO/Ni-N-CDs0.05 (a) Tauc plots (b).

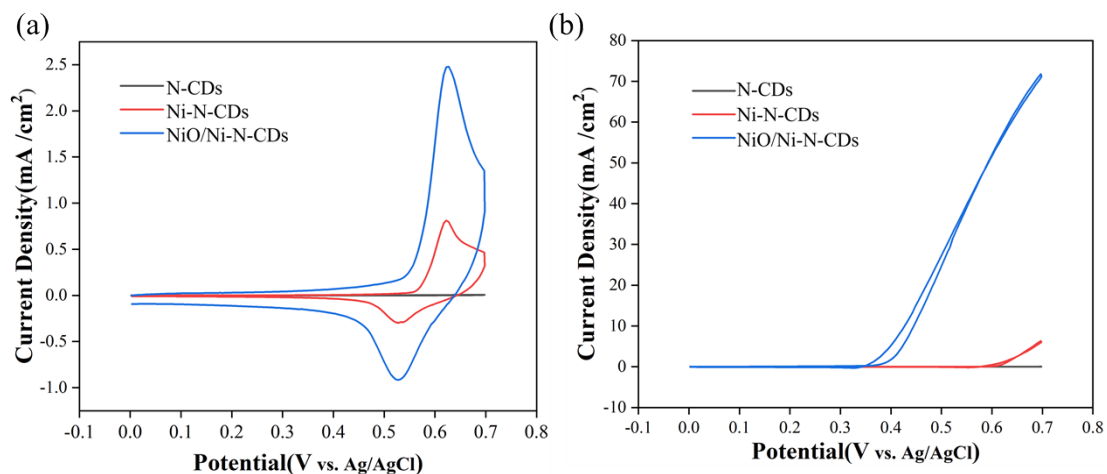

Figure S5. CV curves of Ni-N-CDs, NiO/Ni-N-CDs and N-CDs in (a) 1 M KOH and (b) 1 M KOH + 1 M CH<sub>3</sub>OH.

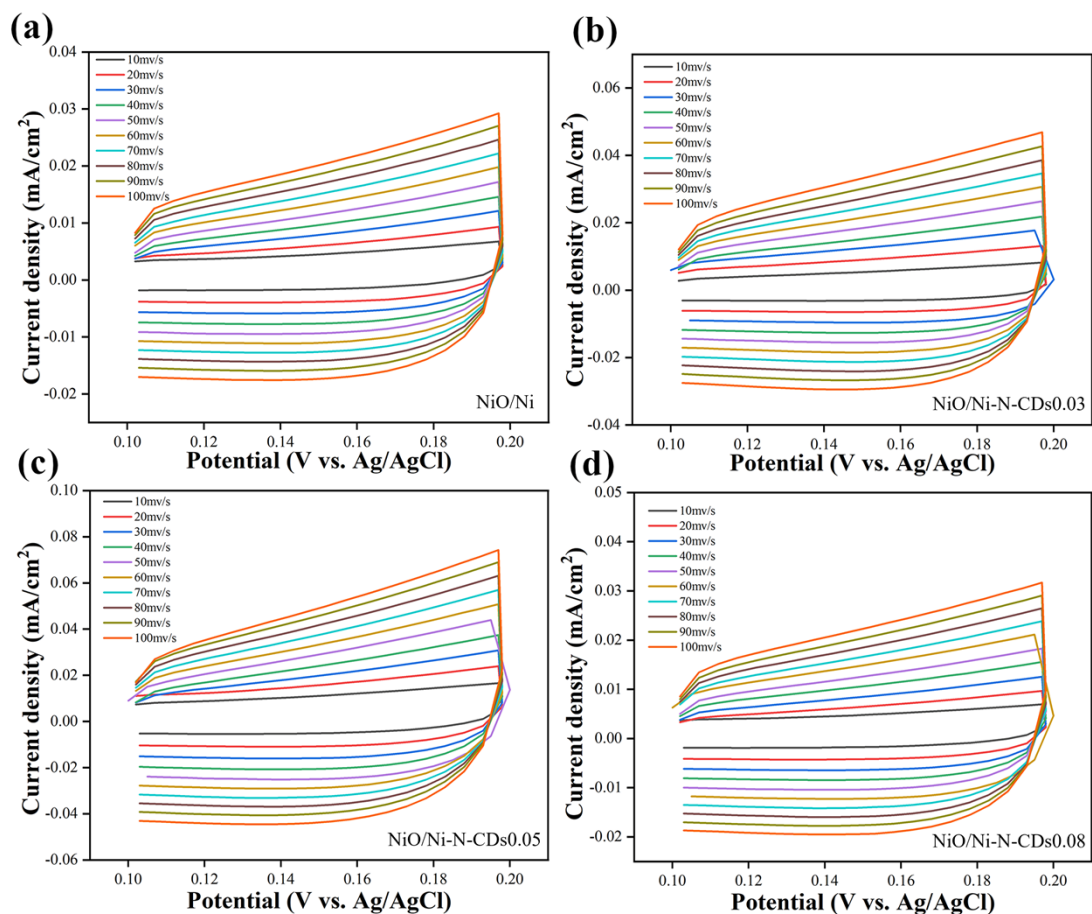

Figure S6. CV curves with different scan rates of (a) NiO/Ni, (b) NiO/Ni-N-CDs0.03, (c) NiO/Ni-N-CDs0.05 and (d) NiO/Ni-N-CDs0.08 in the non-faradaic range of 0.1-0.2 V vs. Ag/AgCl.

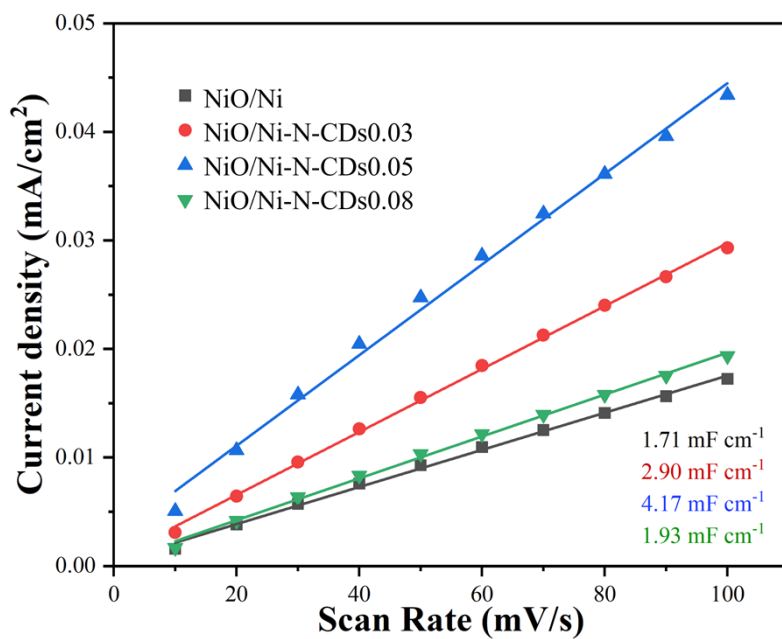

Figure S7. Corresponding linear fit of the capacitive current vs. scan rates to calculate  $C_{dl}$ .

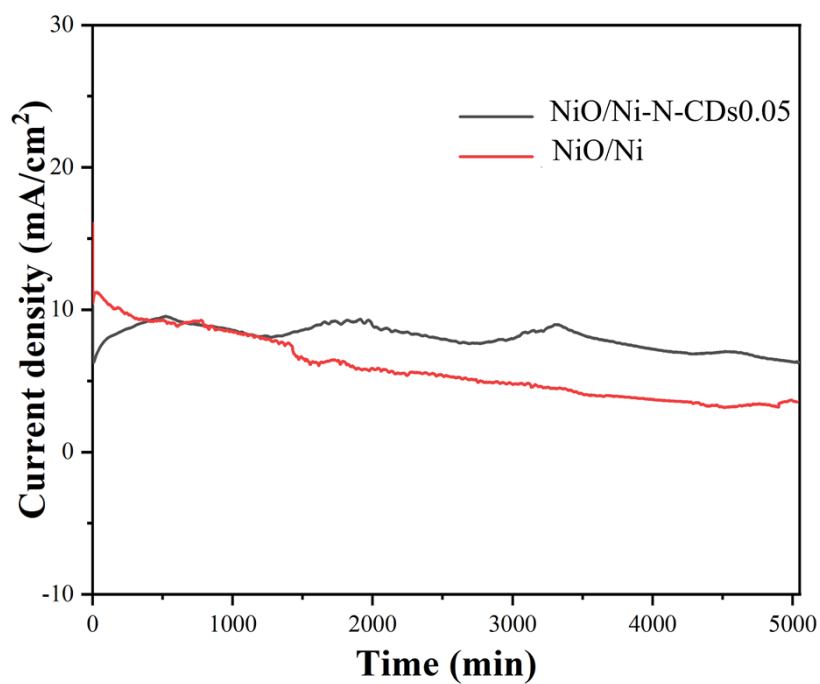

Figure S8. The chronoamperometry curves for all the samples during the MOR.

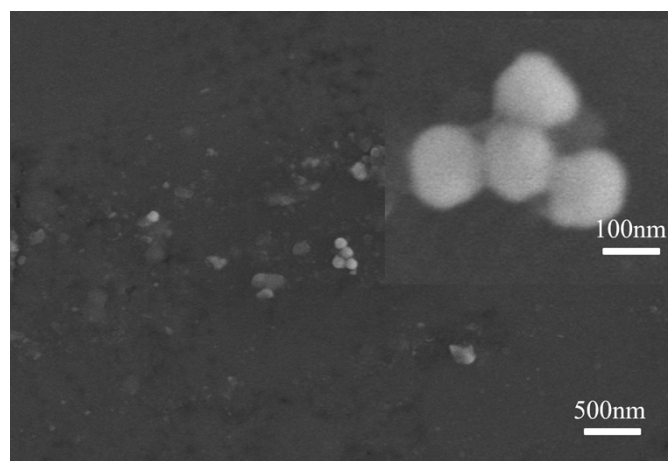

Figure S9. The SEM images of NiO/Ni-N-CDs0.05 after stability test.

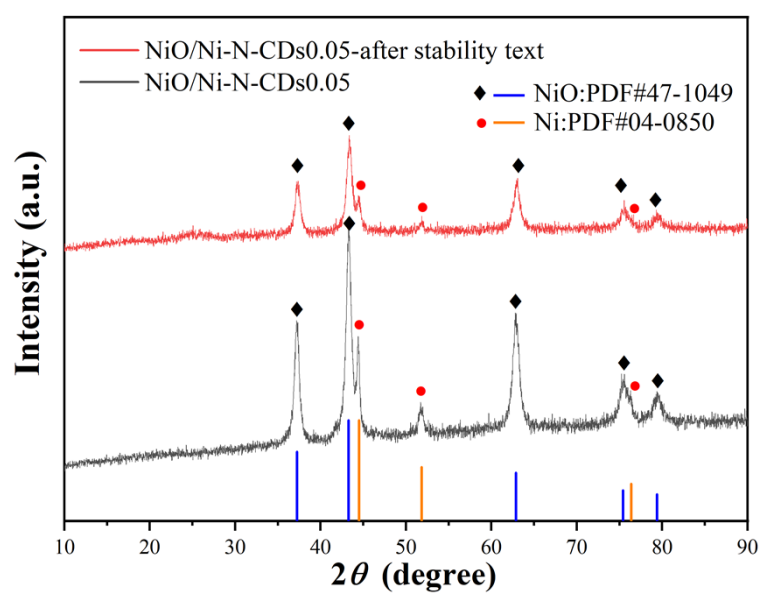

Figure S10. The XRD pattern of NiO/Ni-N-CDs0.05 after stability test.

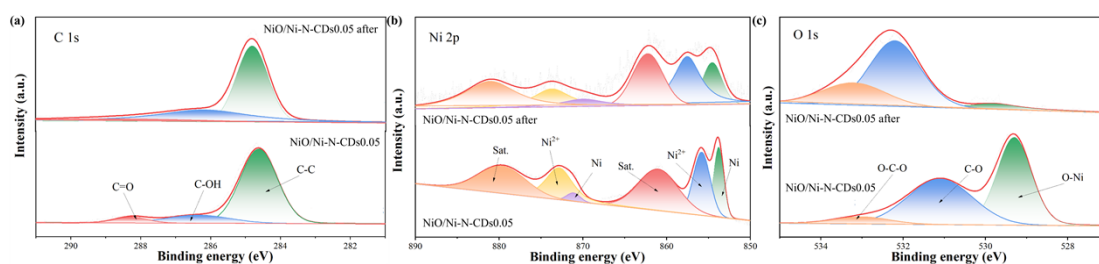

Figure S11. HR-XPS XPS spectra of C 1s (a), Ni 2p (b) and O 1s (c) of NiO/Ni-N-CDs0.05 after stability test.

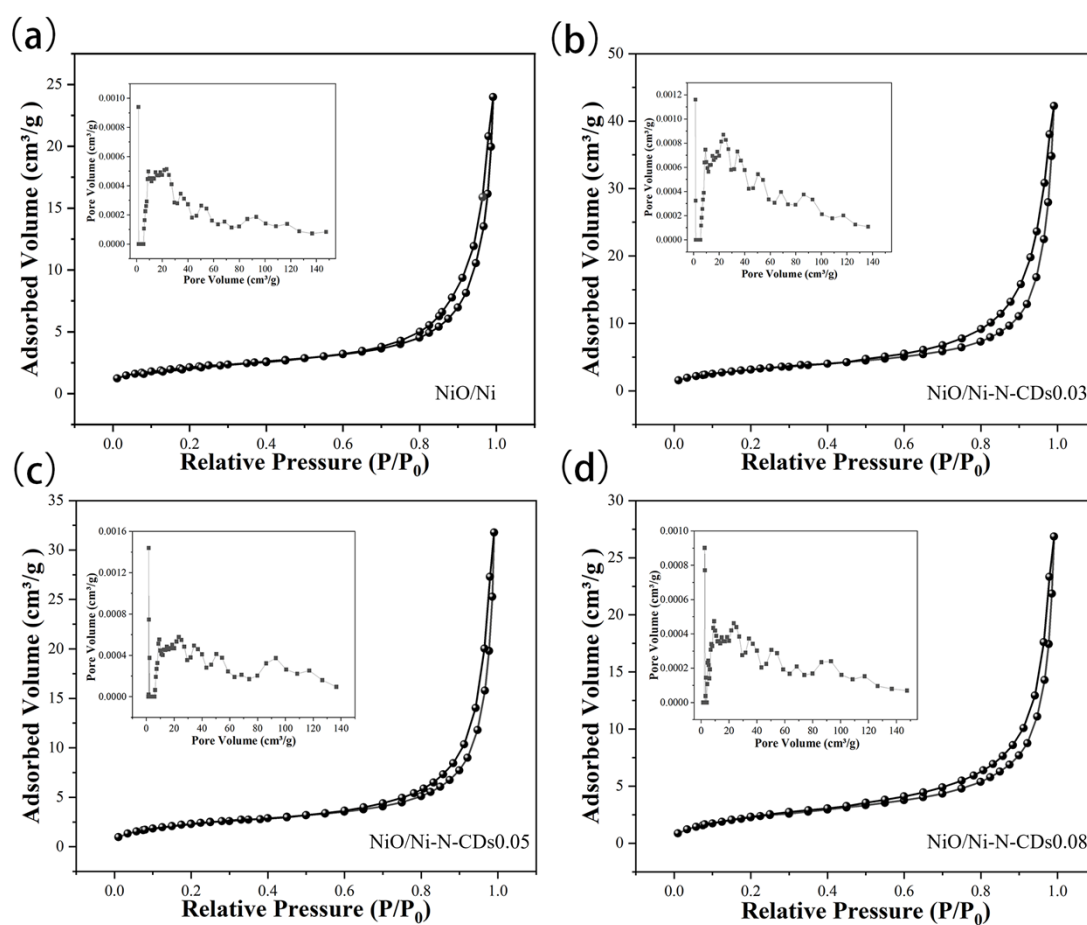

Figure S12. The N<sub>2</sub> adsorption and desorption isotherms of (a) NiO/Ni, (b) NiO/Ni-N-CDs0.03, (c) NiO/Ni-N-CDs0.05 and (d) NiO/Ni-N-CDs0.08.

Table S1. The complete data of the XPS peak fitting of NiO/Ni and NiO/Ni-N-CDs0.05.

| Elements | Peak             | NiO/Ni        |         |           |     | NiO/Ni-N-CDs0.05 |          |           |     |
|----------|------------------|---------------|---------|-----------|-----|------------------|----------|-----------|-----|
|          |                  | Position (eV) | Area    | FWHM (eV) | %GL | Position (eV)    | Area     | FWHM (eV) | %GL |
| C        | C-C              | 284.8         | 18838.4 | 1.2       | 18  | 284.8            | 199188.6 | 1.2       | 10  |
|          | C-OH             | 286.2         | 3199.1  | 1.9       | 51  | 286.2            | 4034.4   | 1.8       | 55  |
|          | C=O              | 288.4         | 1532.2  | 1.5       | 0   | 288.4            | 2010.7   | 1.2       | 50  |
| Ni       | Ni <sup>0</sup>  | 853.2         | 28287.0 | 1.1       | 0   | 853.2            | 28011.2  | 1.1       | 0   |
|          | Ni <sup>0</sup>  | 871.1         | 9247.1  | 1.4       | 0   | 871.1            | 10387.4  | 1.4       | 0   |
|          | Ni <sup>II</sup> | 855.5         | 71028.8 | 2.7       | 0   | 855.5            | 72796.3  | 2.7       | 0   |
|          | Ni <sup>II</sup> | 873.1         | 53872.1 | 3.2       | 63  | 873.1            | 56708.8  | 3.2       | 63  |
|          | Sat.             | 861.1         | 96072.1 | 5.9       | 0   | 861.1            | 94468.4  | 5.9       | 0   |
|          | Sat.             | 879.6         | 73803.7 | 6.6       | 5   | 879.6            | 71283.2  | 6.6       | 0   |
| O        | O-Ni             | 529.3         | 42815.8 | 0.9       | 25  | 529.3            | 40481.7  | 1.0       | 16  |
|          | C-O              | 531.0         | 28457.0 | 1.8       | 0   | 531.1            | 34515.4  | 1.8       | 0   |
|          | O-C-O            | 533.2         | 4938.6  | 2.6       | 0   | 533.2            | 4177.4   | 1.5       | 0   |

## Notes and References

- [S1] Y. Ding, Y. Chen, M. Wang, Effects of Al incorporation on structural and humidity-sensing properties of SnO<sub>2</sub> sensor, J Mater. Sci. Mater. Electron. 35 (2024) 172. <https://doi.org/10.1007/s10854-024-11969-y>.
- [S2] J. Li, Y. Zuo, J. Liu, X. Wang, X. Yu, R. Du, T. Zhang, M.F. Infante-Carrió, P. Tang, J. Arbiol, J. Llorca, Z. Luo, A. Cabot, Superior methanol electrooxidation performance of (110)-faceted nickel polyhedral nanocrystals, J. Mater. Chem. A 7 (2019) 22036-22043, <https://doi.org/10.1039/C9TA07066D>.
